# Supplementary material for: BA.1/BA.5 Immunogenicity, Reactogenicity, and Disease Activity after COVID-19 Vaccination in Patients with ANCA-Associated Vasculitis: A Prospective Observational Cohort Study
Source: MDPI journal article supplement (doi:10.3390/v15081778), 2023-08-21
Supplement: s1 [file s1]

Supplementary Materials

# BA.1/BA.5 Immunogenicity, Reactogenicity, and Disease Activity after COVID-19 Vaccination in Patients with ANCA-Associated Vasculitis: A Prospective Observational Cohort Study

**Table S1.** Cutoff values of the SARS-CoV-2 specific bead-based multiplex assay.

| Target                          | Cutoff (MFI) |
|---------------------------------|--------------|
| SARS-CoV-2 Full Spike           | 6800         |
| SARS-CoV-2 Spike S1             | 2700         |
| SARS-CoV-2 Spike RBD            | 5800         |
| SARS-CoV-2 Spike S2             | 3200         |
| SARS-CoV-2 Nucleocapsid Protein | 5900         |

SARS, severe acute respiratory syndrome; MFI, mean fluorescence intensity.

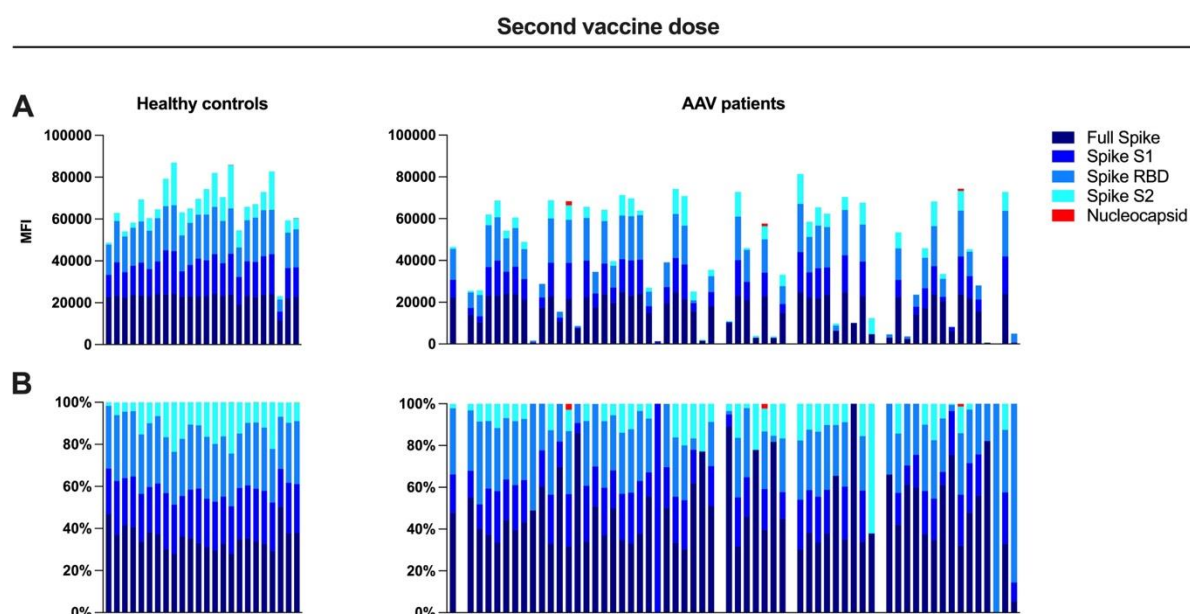

**Figure S1.** Antibodies against different SARS-CoV-2 target epitopes in ANCA-associated vasculitis patients and healthy controls after the second vaccine dose. Multiplex analysis of antibodies against the full spike, the S1 spike, the receptor-binding domain (RBD) of the spike, the S2 spike protein, and the nucleoprotein of SARS-CoV-2 measured in 64 ANCA-associated vasculitis patients and 24 healthy controls after a second vaccine dose matched for type of vaccine, age, and sex. **(A)** The mean fluorescence intensity (MFI) value of the reactivity in ANCA-associated vasculitis patients and healthy controls is represented on the y-axis. The x-axis represents the sample number. **(B)** Proportional contribution (%) of each antibody target to the total MFI value for ANCA-associated vasculitis patients and healthy controls, respectively.

## Side effects questionnaire

|                                                                                                                                                                                                                                                                                                                                                                                                                                                                                                                                                                                                                                                                                                                                                                                                                                                                                                                                                                                                                                                                                                                                                                                                                                                                                                                                                                                                                                                                                                                                                                                                                                                                                                                                                                                                                                                                                                                                                                                                                                                                                                                                                                                                                                                                                                                                                                                                                                                                                                                                                                                                                                                                                                                                                                                                                                                                                                                                                                                                             |
|-------------------------------------------------------------------------------------------------------------------------------------------------------------------------------------------------------------------------------------------------------------------------------------------------------------------------------------------------------------------------------------------------------------------------------------------------------------------------------------------------------------------------------------------------------------------------------------------------------------------------------------------------------------------------------------------------------------------------------------------------------------------------------------------------------------------------------------------------------------------------------------------------------------------------------------------------------------------------------------------------------------------------------------------------------------------------------------------------------------------------------------------------------------------------------------------------------------------------------------------------------------------------------------------------------------------------------------------------------------------------------------------------------------------------------------------------------------------------------------------------------------------------------------------------------------------------------------------------------------------------------------------------------------------------------------------------------------------------------------------------------------------------------------------------------------------------------------------------------------------------------------------------------------------------------------------------------------------------------------------------------------------------------------------------------------------------------------------------------------------------------------------------------------------------------------------------------------------------------------------------------------------------------------------------------------------------------------------------------------------------------------------------------------------------------------------------------------------------------------------------------------------------------------------------------------------------------------------------------------------------------------------------------------------------------------------------------------------------------------------------------------------------------------------------------------------------------------------------------------------------------------------------------------------------------------------------------------------------------------------------------------|
| <p><b>1. Side effects after 1st vaccination:</b></p> <p><input type="radio"/> yes <input type="radio"/> no</p> <p><b>2. If yes, please mark the appropriate side effects you had:</b></p> <p><input type="radio"/> local events (such as pain at injection site, redness, swelling)</p> <p><input type="radio"/> fever <input type="radio"/> fatigue <input type="radio"/> headache <input type="radio"/> chills</p> <p><input type="radio"/> vomiting <input type="radio"/> diarrhea <input type="radio"/> muscle pain <input type="radio"/> joint pain</p> <p><input type="radio"/> swollen lymph nodes <input type="radio"/> others, such as _____</p> <p><b>3. In response to above mentioned side-effects, I took the following medication</b></p> <p><input type="radio"/> NSAID (i.e. Ibuprofen)</p> <p><input type="radio"/> Paracetamol</p> <p><input type="radio"/> Metamizol (i.e. Novalgin)</p> <p><input type="radio"/> Aspirin</p> <p><input type="radio"/> others, such as _____</p> <p><b>1. Side effects after 2nd vaccination:</b></p> <p><input type="radio"/> yes <input type="radio"/> no</p> <p><b>2. If yes, please mark the appropriate side effects you had:</b></p> <p><input type="radio"/> local events (such as pain at injection site, redness, swelling)</p> <p><input type="radio"/> fever <input type="radio"/> fatigue <input type="radio"/> headache <input type="radio"/> chills</p> <p><input type="radio"/> vomiting <input type="radio"/> diarrhea <input type="radio"/> muscle pain <input type="radio"/> joint pain</p> <p><input type="radio"/> swollen lymph nodes <input type="radio"/> others, such as _____</p> <p><b>3. In response to above mentioned side-effects, I took the following medication</b></p> <p><input type="radio"/> NSAID (i.e. Ibuprofen)</p> <p><input type="radio"/> Paracetamol</p> <p><input type="radio"/> Metamizol (i.e. Novalgin)</p> <p><input type="radio"/> Aspirin</p> <p><input type="radio"/> others, such as _____</p> <p><b>1. Side effects after 3rd vaccination:</b></p> <p><input type="radio"/> yes <input type="radio"/> no</p> <p><b>2. If yes, please mark the appropriate side effects you had:</b></p> <p><input type="radio"/> local events (such as pain at injection site, redness, swelling)</p> <p><input type="radio"/> fever <input type="radio"/> fatigue <input type="radio"/> headache <input type="radio"/> chills</p> <p><input type="radio"/> vomiting <input type="radio"/> diarrhea <input type="radio"/> muscle pain <input type="radio"/> joint pain</p> <p><input type="radio"/> swollen lymph nodes <input type="radio"/> others, such as _____</p> <p><b>3. In response to above mentioned side-effects, I took the following medication</b></p> <p><input type="radio"/> NSAID (i.e. Ibuprofen)</p> <p><input type="radio"/> Paracetamol</p> <p><input type="radio"/> Metamizol (i.e. Novalgin)</p> <p><input type="radio"/> Aspirin</p> <p><input type="radio"/> others, such as _____</p> |
|-------------------------------------------------------------------------------------------------------------------------------------------------------------------------------------------------------------------------------------------------------------------------------------------------------------------------------------------------------------------------------------------------------------------------------------------------------------------------------------------------------------------------------------------------------------------------------------------------------------------------------------------------------------------------------------------------------------------------------------------------------------------------------------------------------------------------------------------------------------------------------------------------------------------------------------------------------------------------------------------------------------------------------------------------------------------------------------------------------------------------------------------------------------------------------------------------------------------------------------------------------------------------------------------------------------------------------------------------------------------------------------------------------------------------------------------------------------------------------------------------------------------------------------------------------------------------------------------------------------------------------------------------------------------------------------------------------------------------------------------------------------------------------------------------------------------------------------------------------------------------------------------------------------------------------------------------------------------------------------------------------------------------------------------------------------------------------------------------------------------------------------------------------------------------------------------------------------------------------------------------------------------------------------------------------------------------------------------------------------------------------------------------------------------------------------------------------------------------------------------------------------------------------------------------------------------------------------------------------------------------------------------------------------------------------------------------------------------------------------------------------------------------------------------------------------------------------------------------------------------------------------------------------------------------------------------------------------------------------------------------------------|
